# Supplementary material for: Ursodeoxycholic acid exerts farnesoid X receptor-antagonistic effects on bile acid and lipid metabolism in morbid obesity
Source: PubMed Central journal article supplement (PMC4451470; doi:10.1016/j.jhep.2014.12.034), 2015-06

## CONSORT 2010 Flow Diagram

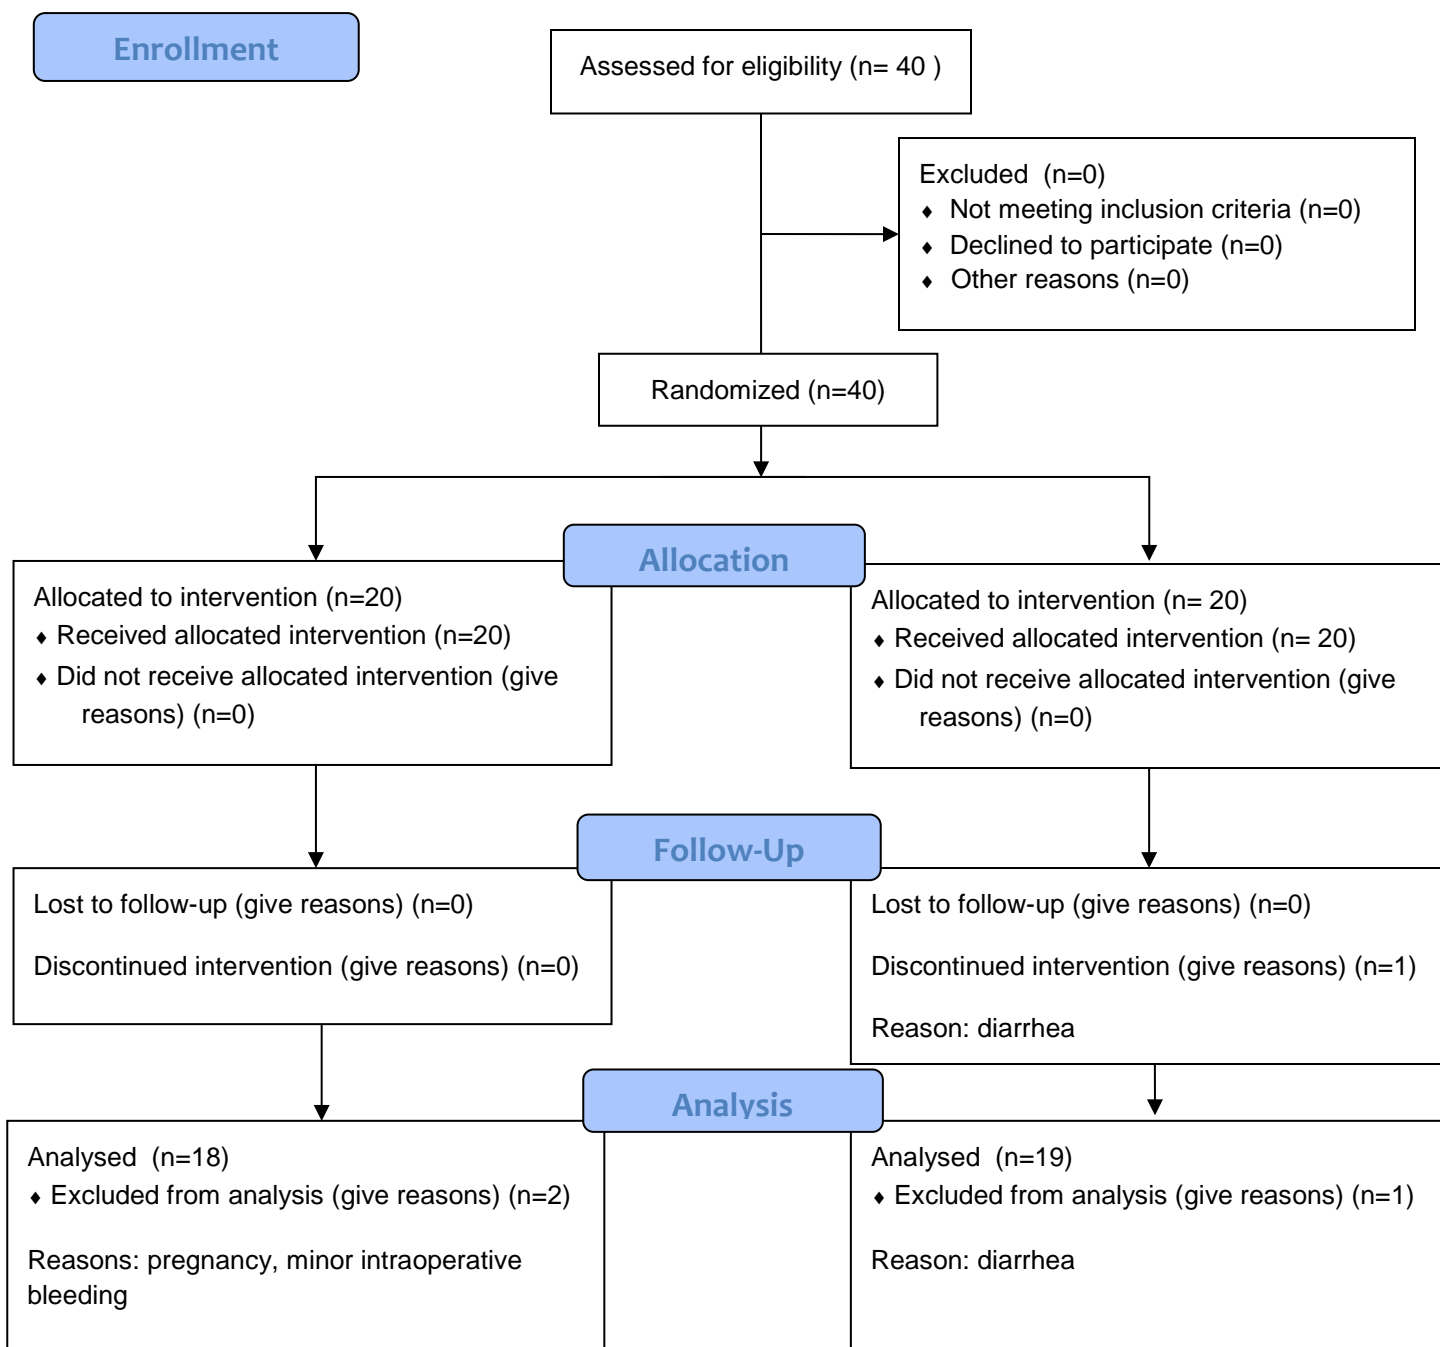

Supplement: mmc3.pdf [file mmc3.pdf]
